# Supplementary material for: Machine learning-based radiomic analysis and growth visualization for ablation site recurrence diagnosis in follow-up CT
Source: Abdom Radiol (NY). 2024 Jan 30;49(4):1122–31. doi: 10.1007/s00261-023-04178-4 (PMC10955006; doi:10.1007/s00261-023-04178-4)
Supplement: Supplementary file 2 — Supplementary file2 (XLSX 9 kb) [file 261_2023_4178_MOESM2_ESM.xlsx]

## Sheet: Sheet1
Feature list for Lasso regression
Feature name	Feature weights
original_shape_Maximum2DDiameterColumn	1.62941
original_shape_Maximum2DDiameterRow	0.807521
original_shape_MeshVolume	0.205447
original_shape_SurfaceVolumeRatio	0.188136
original_firstorder_10Percentile	1.38461
original_firstorder_90Percentile	0.142127
original_firstorder_Entropy	-0.64374
original_firstorder_Kurtosis	0.169819
original_firstorder_Maximum	0.542858
original_firstorder_Mean	0.950157
original_firstorder_Minimum	0.00221892
original_firstorder_Uniformity	1.74694
original_glcm_Idmn	1.1053
original_glcm_Imc1	-0.522734
original_glrlm_GrayLevelNonUniformity	1.20411
original_glszm_LargeAreaEmphasis	0.267566
log-sigma-1-mm-3D_firstorder_10Percentile	0.0939359
log-sigma-1-mm-3D_firstorder_Skewness	0.02817
log-sigma-1-mm-3D_glcm_Autocorrelation	-0.0678655
log-sigma-1-mm-3D_glszm_LargeAreaHighGrayLevelEmphasis	0.450613
log-sigma-1-mm-3D_glszm_LargeAreaLowGrayLevelEmphasis	0.159829
log-sigma-1-mm-3D_glszm_SizeZoneNonUniformityNormalized	-0.233206
log-sigma-3-mm-3D_firstorder_10Percentile	0.29584
log-sigma-3-mm-3D_firstorder_Energy	0.0155199
log-sigma-3-mm-3D_firstorder_MeanAbsoluteDeviation	-0.0394959
log-sigma-3-mm-3D_firstorder_Skewness	0.87798
log-sigma-3-mm-3D_glcm_Autocorrelation	-0.322874
log-sigma-3-mm-3D_glcm_Correlation	-0.402222
log-sigma-3-mm-3D_glcm_Imc1	-0.141263
log-sigma-3-mm-3D_glrlm_LongRunLowGrayLevelEmphasis	0.132205
log-sigma-3-mm-3D_glszm_LargeAreaEmphasis	0.0934274
log-sigma-3-mm-3D_glszm_LargeAreaHighGrayLevelEmphasis	0.154485
log-sigma-3-mm-3D_glszm_SizeZoneNonUniformityNormalized	-0.25871
log-sigma-3-mm-3D_glszm_SmallAreaLowGrayLevelEmphasis	1.0074
log-sigma-3-mm-3D_gldm_DependenceVariance	-0.245156
log-sigma-3-mm-3D_ngtdm_Busyness	0.22046
